# Supplementary material for: Predegenerated Schwann cells–a novel prospect for cell therapy for glaucoma: neuroprotection, neuroregeneration and neuroplasticity
Source: PubMed Central journal article supplement (PMC4817039; doi:10.1038/srep23187), 2016-04-01
Supplement: srep23187-s1.pdf [file srep23187-s1.pdf]

## **Supplementary Informations**

### **Predegenerated Schwann cells – a novel prospect for cell therapy for glaucoma: neuroprotection, neuroregeneration and neuroplasticity**

Smedowski Adrian<sup>1,2,3</sup>, Liu Xiaonan<sup>4</sup>, Pietrucha-Dutczak Marita<sup>1</sup>, Matuszek Iwona<sup>1</sup>,  
Varjosalo Markku<sup>4</sup>, Lewin-Kowalik Joanna<sup>1,\*</sup>

<sup>1</sup>Chair and Department of Physiology, School of Medicine in Katowice, Medical University of Silesia, Medykow 18, 40-752 Katowice, Poland

<sup>2</sup>Department of Ophthalmology, University of Eastern Finland, P.O. Box 1627, 70211 Kuopio, Finland

<sup>3</sup>Department of Ophthalmology, School of Medicine with the Division of Dentistry in Zabrze, Medical University of Silesia, Panewnicka 65, 40-760 Katowice, Poland

<sup>4</sup>Institute of Biotechnology, P.O. Box 65, University of Helsinki, 00014 Helsinki, Finland

\*Professor Joanna Lewin-Kowalik MD, PhD; Department of Physiology, Medykow 18, 40-752 Katowice, Poland; Phone: +48322525087, Fax: +48322088300, email: jlk4@wp.pl

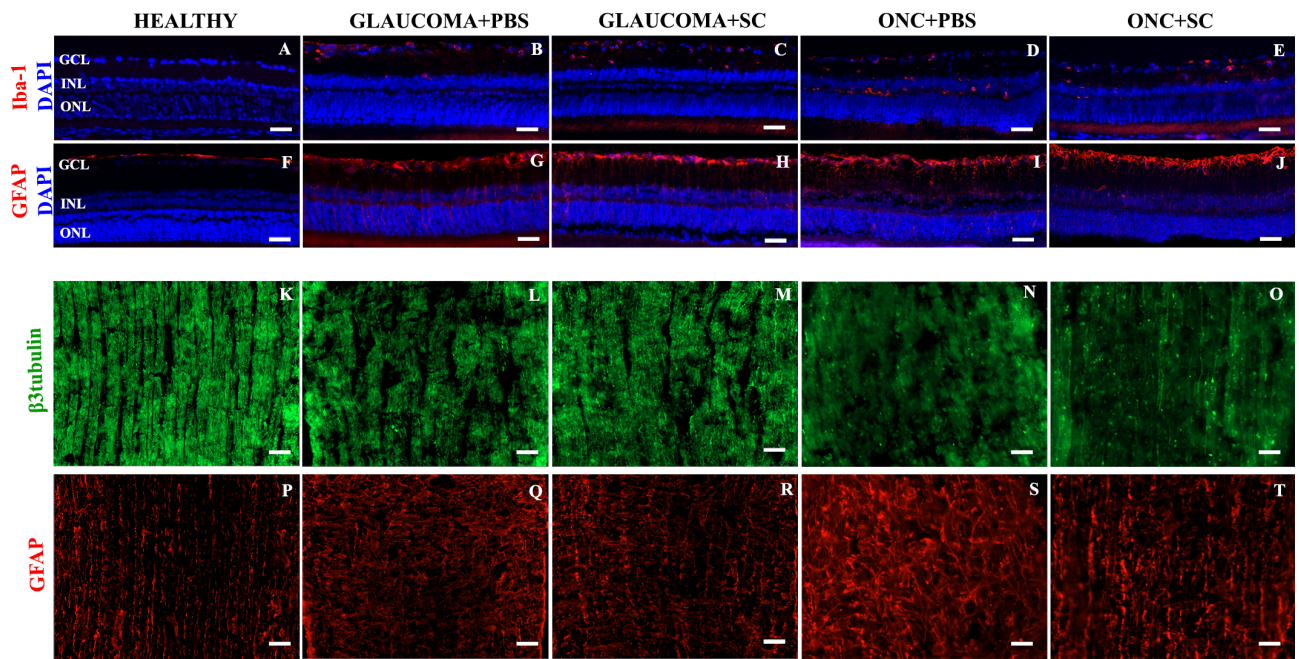

**Supplementary Figure 1.** Retinal cross-sections (A-J) and optic nerve longitudinal sections (K-T) with immunofluorescent staining. Within retina, applied cell therapy does not exacerbate microglial cells/macrophages infiltration (A-E) and retinal glia proliferation (F-J). In optic nerve longitudinal sections, SC therapy preserves lineal architecture and improved survival of RGC axons (K-O), as well as reduces reactive gliosis (P-T). Scale bar=50  $\mu$ m. SC - Schwann cells; GCL - ganglion cell layer; INL - inner nuclear layer; ONL - outer nuclear layer; ONC – optic nerve crush.

**Supplementary Table 1.** Protein list identified in MS analysis of SC culture medium and SC homogenate. SC secretome and SC homogenate do not contain neurotrophic factors. Protein list includes medium analysis, SC homogenate analysis and positive controls samples (i.e., 1.0 ng/ml and 0.1 ng/ml of BDNF and CNTF, respectively). Attached as separated excel file.

**Supplementary Table 2.** Primary antibodies applied for immunostainings.

| <b>Antibody</b>                                                | <b>Manufacturer</b>               | <b>Dilution</b> | <b>Target</b>                                                    |
|----------------------------------------------------------------|-----------------------------------|-----------------|------------------------------------------------------------------|
| mouse<br>anti-NeuN<br>(clone A60)<br>MA B377                   | Millipore                         | 1:500           | neuronal nuclei                                                  |
| rabbit<br>anti- $\beta$ 3-tubulin<br>XP <sup>TM</sup><br>D7169 | Cell<br>Signaling<br>Technologies | 1:300           | retinal ganglion cells                                           |
| rabbit<br>anti-GFAP<br>Z0334                                   | DAKO                              | 1:1000          | glial cells, astrocytes, Schwann cells                           |
| rabbit<br>anti-GAP43<br>AB5220                                 | Millipore                         | 1:300           | differentiating and regenerating neurons<br>during axonal growth |
| rabbit<br>anti-S-100<br>Z0311                                  | Cell<br>Signaling<br>Technologies | 1:300           | Schwann cells, Müller cells                                      |
| mouse<br>anti-synaptophysin<br>MAB329                          | Millipore                         | 1:300           | small presynaptic vesicles                                       |
| rabbit<br>anti-Iba-1<br>#019-19741                             | Wako                              | 1:300           | microglial cells, macrophages                                    |
